# Supplementary material for: Galectin-3 Plays an Important Role in Preterm Birth Caused by Dental Infection of Porphyromonas gingivalis
Source: PubMed Central journal article supplement (PMC5809409; doi:10.1038/s41598-018-21072-y), 2018-02-12
Supplement: 41598_2018_21072_MOESM1_ESM.pdf [file 41598_2018_21072_MOESM1_ESM.pdf]

# **Galectin-3 Plays an Important Role in Preterm Birth Caused by Dental Infection of *Porphyromonas gingivalis***

Mutsumi Miyauchi<sup>1\*</sup>, Min Ao<sup>1,2\*†</sup>, Hisako Furusho<sup>1\*</sup>, Chanbora Chea<sup>1</sup>, Atsuhiko Nagasaki<sup>1</sup>, Shinnichi Sakamoto<sup>1</sup>, Toshinori Ando<sup>1</sup>, Toshihiro Inubushi<sup>1††</sup>, Katsuyuki Kozai<sup>2</sup> and Takashi Takata<sup>1</sup>

## Supplemental Figure 1

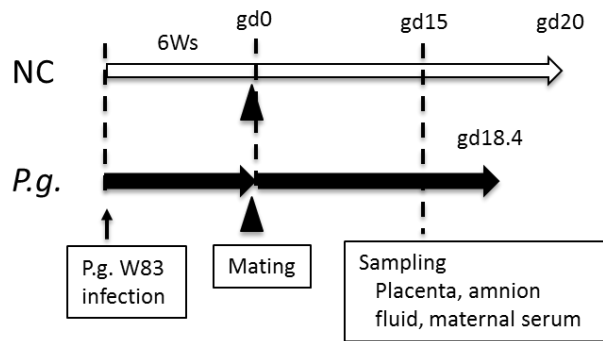

### Supplementary Figure 1

#### Gal-3 mRNA expression in macrophages and endothelial cells.

Gal-3 mRNA expression and production from macrophage (PMA stimulated THP-1) (A) and endothelial cell (HuhT1) (B) with *P.g.*-LPS (1 $\mu$ g/ml) stimulation. Data are presented as the mean  $\pm$  SD. \*\* $p < 0.01$ ; Student's t-test.

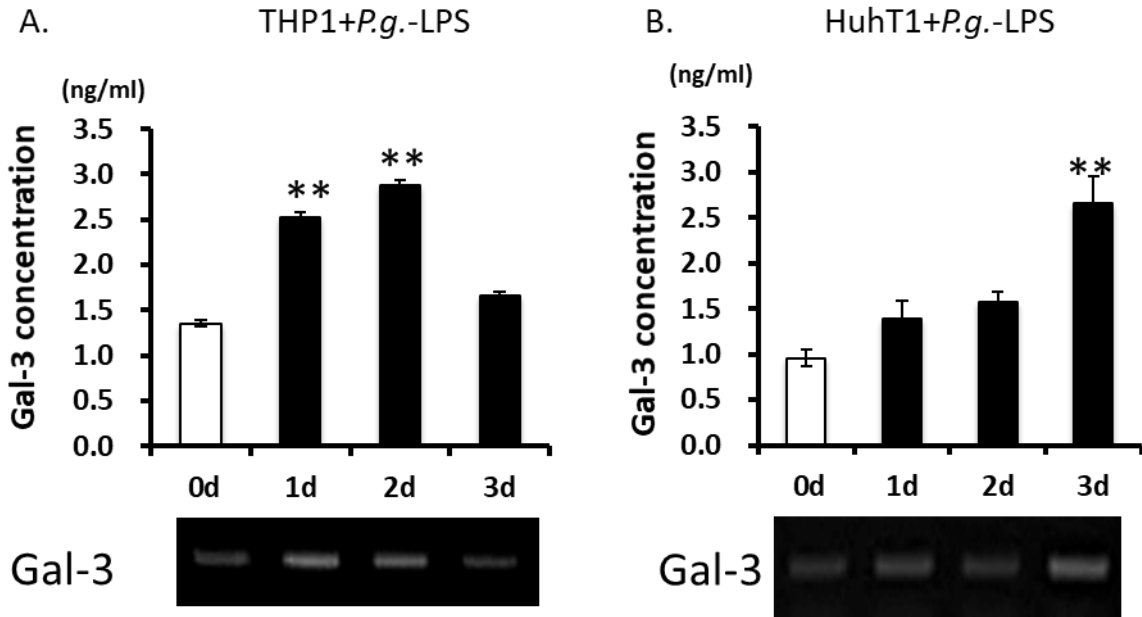

**Supplementary Figure 2**

**Effects of costimulation of Gal-3 and various types of LPS.**

Trophoblasts (HTR-8 cells) were stimulated for 48 hours with LPS (100 ng/ml) from *P.g.* (A), *A.a.*, or *E. coli* (B) with or without rhGal-3 (0.5 µg/ml). COX-2, IL-8 and TNF-α mRNA expression was analysed by the PCR. Synergistically upregulated cytokine mRNA expression was seen by combination with *P.g.*-LPS and Gal-3. The combination with *A.a.* or *E. coli*-LPS showed reduced expression of them. GAPDH was used as an internal control.

### Supplemental Figure 3

A

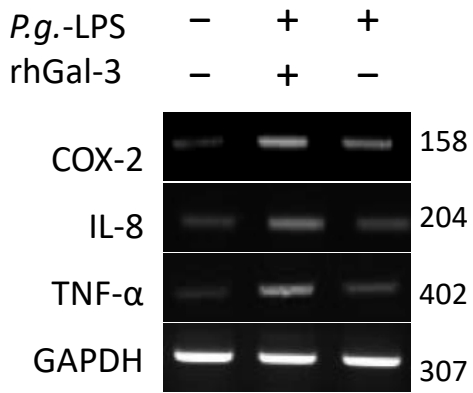

B

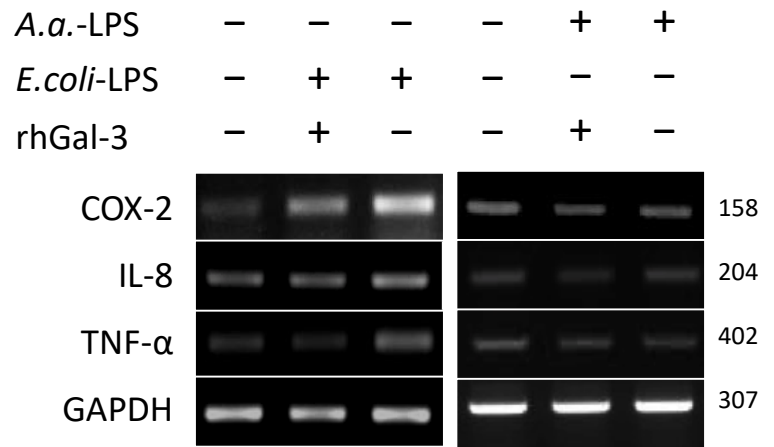

### Supplementary Figure 3.

Experimental schedule to assess the effects of dental *P.g.* infection on placental tissues.
